# Supplementary material for: ALCAT1 Overexpression Affects Supercomplex Formation and Increases ROS in Respiring Mitochondria
Source: Hindawi journal article supplement (doi:10.1155/2019/9186469), 2019-12-06
Supplement: f1 [file 9186469.f1.pdf]

## Artificial ALCAT1 overexpression affects supercomplex formation and increases ROS in respiring mitochondria

Bettina Rieger\*<sup>1</sup>, Adéla Krajčová<sup>1,2</sup>, Patrick Duwe<sup>1</sup>, Karin B. Busch\*<sup>1</sup>

### Supplementary information

**Co-localization analysis of ALCAT1.** The quantification of the co-localization was performed using the Pearson coefficient, with a value of +1 for perfect correlation and -1 for perfect anticorrelation. According to these values, the proportion of ALCAT1 co-localization with lysosomes was significantly higher than the co-localization of ALCAT1 and mitochondria or lysosomes and mitochondria (Fig. S1B-C). Thresholding only made a significant difference for the last two groups (ALCAT1 and mitochondria compared to lysosomes and mitochondria), which were equal. In addition to the Pearson coefficient, the estimated split Manders colocalization coefficients with a value of +1 for perfect correlation and 0 for perfect anticorrelation were also analyzed (Fig. S1D-E). There is a coefficient for each of the two channels indicating the proportion of the signal in one channel colocalized with the other channel. In this case, there is not much difference between the two channels. While the Pearson coefficient uses the deviation from the mean, the Manders coefficients use the absolute intensities. With these coefficients, the overlap between ALCAT1 and lysosomes is still quite high. However, the overlap between ALCAT1 and mitochondria is higher in this case, while according to this analysis the overlap between lysosomes and mitochondria is lower (Fig. S1D-E).

**Seahorse XF Cell Mito Stress Test Kit.** The Seahorse XF Cell Mito Stress Test Kit enables metabolic profiling of mitochondria measuring the oxygen consumption rate (OCR) and extracellular acidification rate (ECAR). It uses sequential injection of inhibitors (oligomycin, FCCP, rotenone/antimycin A) of the ETC complexes to measure basal respiration, proton leak, ATP production and non-mitochondrial respiration (Fig. S2). After measuring the basal respiration, oligomycin, an inhibitor of the ATP synthase, is injected and causes a decreased OCR that characterizes the ATP-linked mitochondrial respiration. FCCP is an uncoupling compound that intercepts the membrane potential so that the electron flow through the ETC complexes is faster and the maximal amount of oxygen is reduced by CIV. The measured OCR shows the maximal respiration. The injection of rotenone and antimycin A inhibits the activity of CI and CIII. As a result, no electrons are transported by the ETC and the mitochondrial respiration shuts down. This enables the measurement of non-mitochondrial respiration. Moreover, the ratio of ATP production to basal respiration represents the coupling efficiency of the mitochondrial respiration (XF Cell Mito Stress Test Kit User Guide).

**Determination of mitochondrial membrane potential.** Tetramethylrhodamine ethyl ester (TMRE) is a fluorescent and lipophilic cation that accumulates within mitochondria dependent on the negative mitochondrial membrane potential (MMP). Consequently, a higher mitochondrial fluorescence indicates a more negative MMP (O'Reilly et al., 2003). The cells were incubated in medium containing 7 nM TMRE under normal growth conditions (37 °C, 5 % CO<sub>2</sub>). After 30 min of incubation with the dye, the samples were used for fluorescence microscopic analysis (ex. 559 nm, em. 650-710 nm). The cells were imaged using the following settings:  $\lambda_{\text{ex}}$ . 579 nm,  $\lambda_{\text{em}}$ . 590-610 nm.

## Supplementary Figures

### Supplementary Figure S1

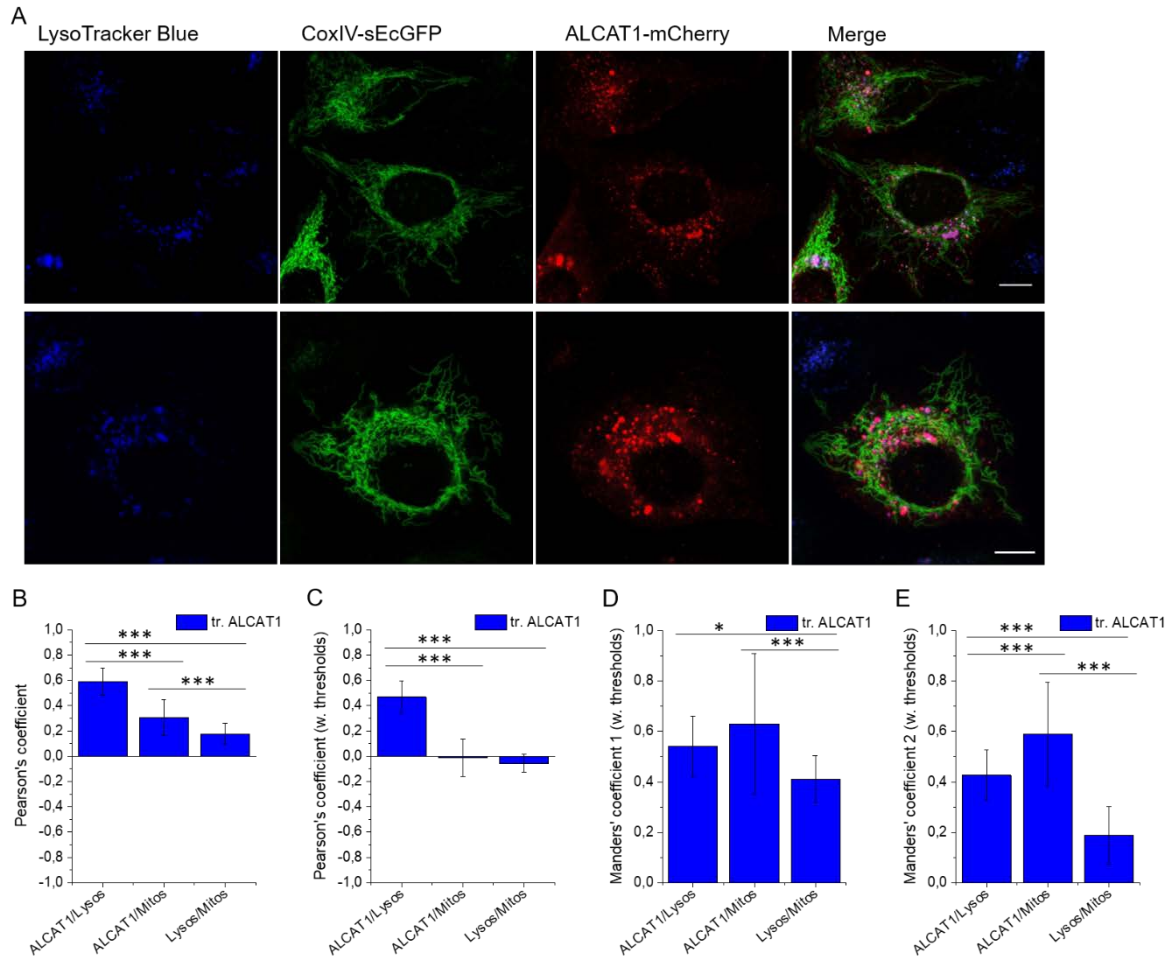

**Suppl. Figure 1. Intracellular localization of overexpressed ALCAT1 in HeLa cells.** (A) Triple color fluorescence microscope analysis of transiently transfected HeLa cells expressing the mitochondrial protein CoxIV-sEcGFP and ALCAT1-mCherry, stained with LysoTracker blue™. The images were processed with ImageJ to enhance the contrast. (B) Pearson's coefficients and (C) Pearson's coefficients using thresholds for both channels and (D-E) thresholded Manders' split colocalization coefficients for Co-localization analysis (N=2, 21 cells). The ImageJ plugin "Colocalization threshold" was used for calculation of the coefficients, automatically determining thresholds for each channel. One Way ANOVA with post hoc Tukey (\*\* $P < 0,001$ ; \* $P < 0.01$ ; \* $P < 0.05$ ), SD are shown. Scale bars: 10  $\mu$ M (A).

Supplementary Figure S2

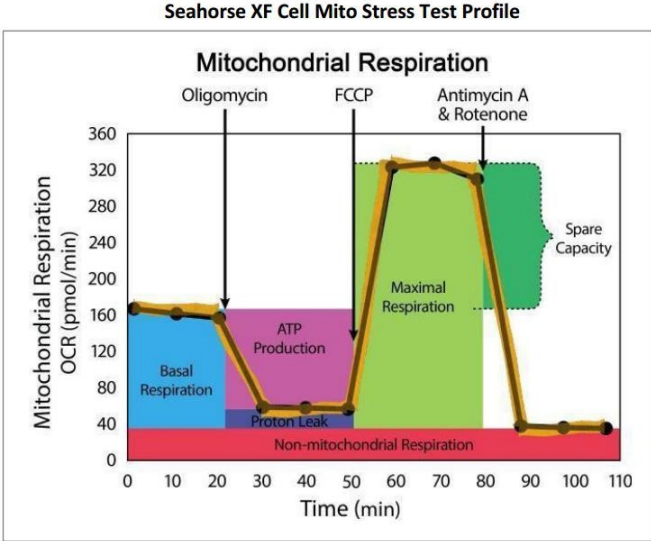

**Suppl. Figure 2. Seahorse XF Cell Mito Stress Test Profile.** The serial injection of ETC complex inhibitors enables the measurement of basal respiration, proton leak, maximal respiration and non-mitochondrial respiration. (XF Cell Mito Stress Test Kit User Guide)

### Supplementary Figure S3

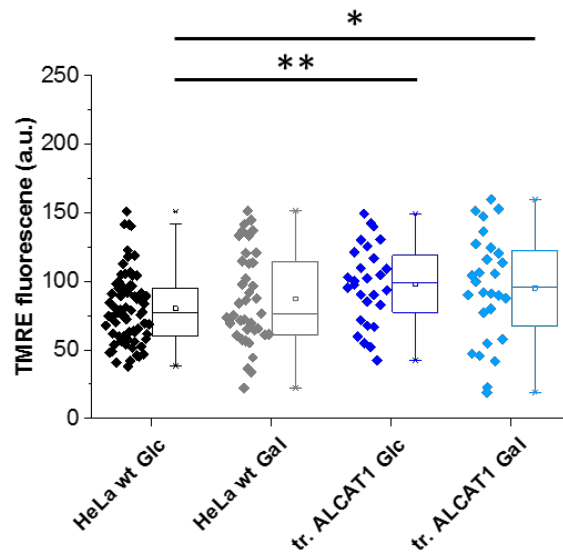

**Suppl. Figure S3. Mitochondrial membrane potential in ALCAT overexpressing cells.** Mitochondria in cells were stained with TMRE: ( $\lambda_{ex}$ . 559 nm,  $\lambda_{em}$ . 650-710 nm. (A and B) Quantitative analysis of fluorescence intensities displayed as box plots with the measured fluorescence intensities of 20-30 measured cells on the left. The experiments were performed at RT without temperature control. N=2 (\*\* $P < 0,001$ ; \*\* $P < 0.01$ ; \* $P < 0.05$ ).

## Supplementary Information

**Table 1.** Primary antibodies used for Western Blot analysis

| Name                     | Species reactivity | Host   | poly/mono | kDa | Dilution for WB | Company        |
|--------------------------|--------------------|--------|-----------|-----|-----------------|----------------|
| Anti-ALCAT1              | Human              | Rabbit | poly      | 49  | 1:2000          | abcam          |
| Anti-ATP5b [Su $\beta$ ] | Human, Rat, Mouse  | Rabbit | poly      | 56  | 1:2000          | proteintech    |
| Anti-ATP5I [Sue]         | Human, Rat, Mouse  | Rabbit | poly      | 8   | 1:500           | abcam          |
| Anti-VDAC                | Human, Rat, Mouse  | Rabbit | poly      | 32  | 1:2000          | Cell signaling |

The peroxidase-conjugated AffiniPure Goat Anti-Rabbit IgG (H+L) (Jackson ImmunoResearch, dianova) was used as a secondary antibody at a final dilution of 1:2000.

## Gene sequence of pSems-ALCAT1-2A-GFP-NL

---

### Molecule Features

Molecule: pSems-ALCAT1-2A-GFP-NLS, 7301 bps DNA Circular

File Name: pSems-ALCAT1-2A-GFP-NLS.cm5, dated 23 Feb 2016

Description:

| Start | End Name           | Feature Key | Draw |
|-------|--------------------|-------------|------|
| 921   | 2162 <b>ALCAT1</b> |             | Gene |
| 2166  | 2231 2A            |             | Gene |
| 2232  | 2945 <b>EGFP</b>   |             | Gene |
| 2952  | 3020 <b>NLS</b>    |             | Gene |
| 3988  | 4788 Neomycin      |             | Gene |

GACGGATCGGGAGATCTCCCGATCCCCTATGGTCGACTCT  
CAGTACAATC

TGCTCTGATGCCGCATAGTTAAGCCAGTATCTGCTCCCTGC  
TTGTGTGTT

GGAGGTCGCTGAGTAGTGCGCGAGCAAAATTTAAGCTAC  
AACAAAGGCAAG

GCTTGACCGACAATTGCATGAAGAATCTGCTTAGGGTTAG  
GCGTTTTGCG

CTGCTTCGCGATGTACGGGCCAGATATACGCGTTGACATT  
GATTATTGAC

TAGTTATTAATAGTAATCAATTACGGGGTCATTAGTTCATA  
GCCCATATA

TGGAGTCCGCGTTACATAACTTACGGTAAATGGCCCCG

TGGCTGACCG

CCCAACGACCCCCGCCATTGACGTCAATAATGACGTATGT

TCCCATAGT

AACGCCAATAGGGACTTTCCATTGACGTCAATGGGTGGAC

TATTTACGGT

AAACTGCCCACTTGGCAGTACATCAAGTGTATCATATGCCA

AGTACGCC

CCTATTGACGTCAATGACGGTAAATGGCCCCGCTGGCATT

ATGCCAGTA

CATGACCTTATGGGACTTTCCTACTTGGCAGTACATCTACG

TATTAGTCA

TCGCTATTACCATGGTGATGCGGTTTTGGCAGTACATCAAT

GGGCGTGGA

TAGCGTTTTGACTCACGGGGATTTCCAAGTCTCCACCCCAT

TGACGTCAA

TGGGAGTTTGTGGCACCAAATCAACGGGACTTTCCA

AAATGTCGTA

ACAACCTCCGCCCATGACGCAAATGGGCGGTAGGCGTGT

ACGGTGGGAG

GTCTATATAAGCAGAGCTCTCTGGCTAACTAGAGAACCCA

CTGCTTACTG

GCTTATCGAAATTAATACGACTCACTATAGGGAGACCCAA

GCTTGGTACC

GAGCTCGGACCGGTGCTAGCATGCATTCCAGGGGAAGGGAAATTGTGGTG

CTTCTGAACCCATGGTCAATTAACGAGGCAGTTTCTAGCTACTGCACGTA

CTTCATAAAGCAGGACTCTAAAAGCTTTGGAATCATGGTGCATGGAAAG

GGATTTACTTTATACTGACTCTGTTTTGGGGAAGCTTTTTTGAAGCATT

TTCATGCTGAGTCCTTTTTACCTTTGATGTTTGTAACCCATCTTGGTA

TCGCTGGATCAACAACCGCCTTGTGGCAACATGGCTCACCTACCTGTGG

CATTATTGGAGACCATGTTTGGTGTAAAAGTGATTATAACTGGGGATGCA

TTTGTTCCTGGAGAAAGAAGTGTCAATATCATGAACCATCGGACAAGAAT

GGACTGGATGTTTCTGTGGAATTGCCTGATGCGATATAGCTACCTCAGAT

TGGAGAAAATTTGCCTCAAAGCGAGTCTCAAAGGTGTTTCTGGATTTGGT

TGGGCCATGCAGGCTGCTGCCTATATCTTCATTCATAGGAAATGGAAGGA



TGACAAGAGCCATTTCTGAAGACATGATTGATTACTTTTGTGATATTCACG  
AACCACTTCAACTCCTCATATCCCAGAAGGGACTGATCTCACAGAAAAC  
AGCAAGTCTCGAAGTAATGCATTTGCTGAAAAAATGGACTTCAGAAATA  
TGAATATGTTTTACATCCAAGAACTACAGGCTTTACTTTTGTGGTAGACC  
GTCTAAGAGAAGGTAAGAACCTTGATGCTGTCCATGATATCACTGTGGCG  
TATCCTCACAACATTCTCAATCAGAGAAGCACCTCCTCCAAGGAGACTT  
TCCCAGGGAAATCCACTTTCACGTCCACCGGTATCCAATAGACACCCTCC  
CCACATCCAAGGAGGACCTTCAACTCTGGTGCCACAAACGGTGGGAAGAG  
AAAGAAGAGAGGCTGCGTTCCTTCTATCAAGGGGAGAAGAATTTTTATT  
TACCGGACAGAGTGTCAATCCACCTTGCAAGTCTGAACTCAGGGTCCTTG  
TGGTCAAATTGCTCTATACTGTATTGGACCCTGTTAGCCCTGCAATG  
TGCCTACTCATATATTTGTACAGTCTTGTTAAGTGGTATTTTATAATCAC  
CATTGTAATCTTTGTGCTGCAAGAGAGAATATTTGGTGGACTGGAGATCA  
TAGAACTTGCATGTTACCGACTTTTACACAAACAGCCACATTTAAATTCA  
AAGAAAAATGAGCTCGAGGGCAGTGGAGAGGGCAGAGG

AAGTCTGCTAAC

ATGCGGTGACGTCGAGGAGAATCCTGGCCAGTGAGCAA

GGGCGAGGAGC

TGTTACCCGGGGTGGTGCCATCCTGGTCGAGCTGGACGGCGACGTAAAC  
GGCCACAAGTTCAGCGTGTCCGGCGAGGGCGAGGGCGATGCCACCTACGG  
CAAGCTGACCCTGAAGTTCATCTGCACCACCGCAAGCTGCCCGTGCCCT  
GGCCACCCTCGTGACCACCCTGACCTACGGCGTGCAAGTTCAGCCGC  
TACCCCGACCACATGAAGCAGCAGACTTCTTCAAGTCCGCCATGCCCGA  
AGGCTACGTCCAGGAGCGCACCATCTTCTTCAAGGACGACGGCAACTACA  
AGACCCGCGCCGAGGTGAAGTTCGAGGGCGACACCCTGGTGAACCGCATC  
GAGCTGAAGGGCATCGACTTCAAGGAGGACGGCAACATCCTGGGGCACAA  
GCTGGAGTACAACACTACAACAGCCACAACGTCTATATCATGGCCGACAAGC  
AGAAGAACGGCATCAAGGTGAAGTTCAGATCCGCCACAACATCGAGGAC  
GGCAGCGTGCAGCTCGCCGACCACTACCAGCAGAACACCCCATCGGCGA  
CGGCCCGTGTGCTGCTGCCGACAACCACTACCTGAGCACCCAGTCCGCC  
TGAGCAAAGACCCCAACGAGAAGCGCGATCACATGGTCTGCTGGAGTTC  
GTGACCGCCGCGGGATCACTCTCGGCATGGACGAGCTGTACAAGGCGGC  
CCCAAAGAAAAAGCGTAAAGTTGATCCAAAAAGAAGAGAAAGGTAGATC  
CAAAGAAAAAGCGTAAAGTTAAGCGGCCGCATAGATAA

CTGATCCAGTG

TGCTGGAATTAATTCGCTGTCTGCGAGGGCCAGCTGTTGG

GGTGAGTACT

CCCTCTCAAAGCGGGCATGACTTCTGCGCTAAGATTGTC

AGTTTCCAAA

AACGAGGAGGATTTGATATTCACCTGGCCCGCGGTGATGC

CTTTGAGGGT

GGCCGCGTCCATCTGGTCAGAAAAGACAATCTTTTTGTTGT  
CAAGCTTGA

GGTGTGGCAGGCTTGAGATCTGGCCATACACTTGAGTGAC  
AATGACATCC

ACTTTGCCTTTCTCTCCACAGGTGTCCACTCCCAGGTCCAA  
CTGCAGGTC

GAGCATGCATCTAGGGCGGCCAATTCCGCCCTCTCCCTCC  
CCCCCCCCT

AACGTTACTGGCCGAAGCCGCTTGAATAAGGCCGGTGT  
GCGTTTGTCTA

TATGTTATTTCCACCATATTGCCGTCTTTTGGCAATGTGAG  
GGCCCGGA

AACCTGGCCCTGTCTTCTTGACGAGCATTCCTAGGGGTCTT  
TCCCCTCTC

GCCAAAGGAATGCAAGGTCTGTTGAATGTCGTGAAGGAA  
GCAGTTCCTCT

GGAAGCTTCTTGAAGACAAACAACGTCTGTAGCGACCCTT  
TGCAGGCAGC

GGAACCCCCACCTGGCGACAGGTGCCTCTGCGGCCAAAA  
GCCACGTGTA

TAAGATACACCTGCAAAGGCGGCACAACCCAGTGCCACG  
TTGTGAGTTG

GATAGTTGTGGAAAGAGTCAAATGGCTCTCCTCAAGCGTA  
TTCAACAAGG

GGCTGAAGGATGCCCAGAAGGTACCCATTGTATGGGATC  
TGATCTGGGG

CCTCGGTGCACATGCTTTACATGTGTTTAGTCGAGGTAAA  
AAAACGTCT

AGGCCCCCGAACCACGGGGACGTGGTTTTTCCTTTGAAAA  
ACACGATGAT

AAGCTTGCCACAACCCGGGATAATTCCTGCAGCCAATATG  
GGATCGGCCA

TTGAACAAGATGGATTGCACGCAGGTTCTCCGGCCGCTTG  
GGTGGAGAGG

CTATTCGGCTATGACTGGGCACAACAGACAATCGGCTGCT  
CTGATGCCGC  
CGTGTTCGGCTGTCAGCGCAGGGGCGCCCGTTCTTTTT  
GTCAAGACCG

ACCTGTCCGGTGCCCTGAATGAACTGCAGGACGAGGCAG  
CGCGGCTATCG

TGGCTGGCCACGACGGGCGTTCCTTGCGCAGCTGTGCTCG  
ACGTTGTCAC

TGAAGCGGGAAGGGACTGGCTGCTATTGGGCGAAGTGCC  
GGGGCAGGATC

TCCTGTCATCTCACCTTGCTCCTGCCGAGAAAGTATCCATC  
ATGGCTGAT

GCAATGCGGCGGCTGCATACGCTTGATCCGGCTACCTGCC  
CATTGACCA

CCAAGCGAAACATCGCATCGAGCGAGCACGTACTIONCGGATG  
GAAGCCGGTC

TTGTCGATCAGGATGATCTGGACGAAGAGCATCAGGGGC  
TCGCGCCAGCC

GAACTGTTCCGAGGCTCAAGGCGCGCATGCCCGACGGC  
GATGATCTCGT

CGTGACCCATGGCGATGCCTGCTTGCCGAATATCATGGTG  
GAAAATGGCC

GCTTTTCTGGATTCATCGACTGTGGCCGGCTGGGTGTGGC  
GGACCGCTAT

CAGGACATAGCGTTGGCTACCCGTGATATTGCTGAAGAGC  
TTGGCGGCGA

ATGGGCTGACCGCTTCCTCGTGCTTACGGTATCGCCGCTC  
CCGATTCGC

AGCGCATCGCCTTCTATCGCCTTCTTGACGAGTTCTTCTGA  
GGGGATCAA

TTCTCTAGATAACTGATCATAATCAGCCATACCACATTTGT  
AGAGGTTTT

ACTTGCTTTAAAAAACCTCCCACACCTCCCCCTGAACCTGA  
AACATAAAA

TGAATGCAATTGTTGTTGTTAACTTGTTTATTGCAGCTTATA  
ATGGTTAC

AAATAAAGCAATAGCATCACAAATTCACAAATAAAGCAT  
TTTTTCACT

GCATTCTAGTTGTGGTTTGTCCAAACTCATCAATGTATCTT  
AACGCGTCG

AGTGCATTCTAGTTGTGGTTTGTCCAAACTCATCAATGTAT  
CTTATCATG

TCTGTATACCGTCGACCTCTAGCTAGAGCTTGGCGTAATCA  
TGGTCATAG

CTGTTTCCTGTGTGAAATTGTTATCCGCTCACAATTCCACAC  
AACATACG

AGCCGGAAGCATAAAGTGTAAGCCTGGGGTGCCTAATG  
AGTGAGCTAAC

TCACATTAATTGCGTTGCGCTCACTGCCCGCTTCCAGTCG  
GGAAACCTG

TCGTGCCAGCTGCATTAATGAATCGGCCAACGCGCGGGGA  
GAGGCGGTTT

GCGTATTGGGCGCTCTCCGCTCCTCGCTCACTGACTCGC  
TGCCTCGG

TCGTTCCGGCTGCGGCGAGCGGTATCAGCTCACTCAAAGGC  
GGTAATACGG

TTATCCACAGAATCAGGGGATAACGCAGGAAAGAACATGT  
GAGCAAAAGG  
CCAGCAAAAGGCCAGGAACCGTAAAAAGGCCGCGTTGCT  
GGCGTTTTTCC  
ATAGGCTCCGCCCCCTGACGAGCATCACAAAAATCGACG  
CTCAAGTCAG  
AGGTGGCGAAACCCGACAGGACTATAAAGATACCAGGCG  
TTTCCCCTGG  
AAGCTCCCTCGTGCGCTCCTCTGTTCCGACCCTGCCGCTTA  
CCGGATACC  
TGCCGCCTTTCTCCCTTCGGGAAGCGTGGCGCTTTCTCAA  
TGCTCACGC  
TGTAGGTATCTCAGTTCGGTGTAGGTCGTTGCTCCAAGCT  
GGGCTGTGT  
GCACGAACCCCCCGTTCAGCCCGACCGCTGCGCCTTATCC  
GGTAACTATC  
GTCTTGAGTCCAACCCGGTAAGACACGACTTATCGCCACT  
GGCAGCAGCC  
ACTGGTAACAGGATTAGCAGAGCGAGGTATGTAGGCGGT  
GCTACAGAGTT  
CTTGAAGTGGTGGCCTAACTACGGCTACACTAGAAGGACA  
GTATTTGGTA  
TCTGCGCTCTGCTGAAGCCAGTTACCTTCGGAAAAAGAGT  
TGGTAGCTCT  
TGATCCGGCAAACAAACCACCGCTGGTAGCGGTGGTTTTT  
TTGTTTGCAA  
GCAGCAGATTACGCGCAGAAAAAAGGATCTCAAGAAGA  
TCCTTTGATCT  
TTTCTACGGGGTCTGACGCTCAGTGGAACGAAAACACG  
TTAAGGGATT

TTGGTCATGAGATTATCAAAAAGGATCTTCACCTAGATCCT  
TTTAAATTA  
AAAATGAAGTTTTAAATCAATCTAAAGTATATATGAGTAAA  
CTTGGTCTG  
ACAGTTACCAATGCTTAATCAGTGAGGCACCTATCTCAGC  
GATCTGTCTA  
TTTCGTTTCATCCATAGTTGCCTGACTCCCCGTCGTGTAGAT  
AACTACGAT  
ACGGGAGGGCTTACCATCTGGCCCCAGTGCTGCAATGATA  
CCGCGAGACC  
CACGCTCACCGGCTCCAGATTTATCAGCAATAAACCAGCCA  
GCCGGAAGG  
GCCGAGCGCAGAAGTGGTCCTGCAACTTTATCCGCCTCCA  
TCCAGTCTAT  
TAATTGTTGCCGGAAGCTAGAGTAAGTAGTTCGCCAGTT  
AATAGTTTGC  
GCAACGTTGTTGCCATTGCTACAGGCATCGTGGTGTCACG  
CTCGTCGTTT  
GGTATGGCTTCATTCAGCTCCGGTCCCAACGATCAAGGC  
GAGTTACATG  
ATCCCCATGTTGTGCAAAAAGCGGTTAGCTCCTTCGGTC  
CTCCGATCG  
TTGTCAGAAGTAAGTTGGCCGAGTGTTATCACTCATGGTT  
ATGGCAGCA  
CTGCATAATTCTCTTACTGTCATGCCATCCGTAAGATGCTTT  
TCTGTGAC  
TGGTGAGTACTCAACCAAGTCATTCTGAGAATAGTGTATG  
CGGCGACCGA  
GTTGCTCTTGCCCGCGTCAATACGGGATAAATACCGCGCC  
ACATAGCAGA

ACTTTAAAAGTGCTCATCATTGGAAAACGTTCTTCGGGGC  
GAAAACCTCTC

AAGGATCTTACCGCTGTTGAGATCCAGTTTCGATGTAACCC  
ACTCGTGCAC

CCAACTGATCTTCAGCATCTTTTACTTTCACCAGCGTTTCTG  
GGTGAGCA

AAAACAGGAAGGCAAAATGCCGCAAAAAGGGAATAAG  
GGCGACACGGAA

ATGTTGAATACTCATACTCTTCCTTTTTCAATATTATTGAAG  
CATTTATC

AGGGTTATTGTCTCATGAGCGGATACATATTTGAATGTATT  
TAGAAAAAT

AAACAAATAGGGGTTCCGCGCACATTTCCCGAAAAGTGC  
CACCTGACGT C

### Plasmid map and gene sequence of pSems-ALCAT1-HA

#### Molecule Features

Molecule: pSems-ALCAT1-HAtag, 6476 bps DNA Circular  
File Name: pSems-ALCAT1-HAtag.cm5, dated 11 Feb 2016 Description: Ligation of product ALCAT1\* into pSems-1-26-Halo7-AN-HAtag\*

| Start | End Name           | Feature Key | Draw |
|-------|--------------------|-------------|------|
| 921   | 2162 <b>ALCAT1</b> |             | Gene |
| 2169  | 2195 <b>HA-tag</b> |             | Gene |
| 3163  | 3963 Neomycin      |             | Gene |

GACGGATCGGGAGATCTCCCGATCCCCTATGGTCGACTCT  
CAGTACAATC

TGCTCTGATGCCGCATAGTTAAGCCAGTATCTGCTCCCTGC  
TTGTGTGTT

GGAGGTCGCTGAGTAGTGC GCGAGCAAATTTAAGCTAC  
AACAAAGGCAAG

GCTTGACCGACAATTGCATGAAGAATCTGCTTAGGGTTAG  
GCGTTTTGCG

CTGCTTCGCGATGTACGGGCCAGATATACGCGTTGACATT  
GATTATTGAC

TAGTTATTAATAGTAATCAATTACGGGGTCATTAGTTCATA  
GCCCATATA

TGGAGTTCGCGTTACATAACTTACGGTAAATGGCCCGCC  
TGGCTGACCG

CCCAACGACCCCGCCATTGACGTCAATAATGACGTATGT  
TCCCATAGT

AACGCCAATAGGGACTTTCCATTGACGTCAATGGGTGGAC  
TATTTACGGT



AAACTGCCCACTTGGCAGTACATCAAGTGTATCATATGCCA  
AGTACGCCC

CCTATTGACGTCAATGACGGTAAATGGCCCGCCTGGCATT  
ATGCCAGTA

CATGACCTTATGGGACTTTCCTACTTGGCAGTACATCTACG  
TATTAGTCA

TCGCTATTACCATGGTGATGCGGTTTTGGCAGTACATCAAT  
GGGCGTGGA

TAGCGTTTTGACTCACGGGGATTTCCAAGTCTCCACCCCAT  
TGACGTCAA

TGGGAGTTTGTTTTGGCACCAAATCAACGGGACTTTCCA  
AAATGTCGTA

ACAACCCGCCCCATTGACGCAAATGGGCGGTAGGCGTGT  
ACGGTGGGAG

GTCTATATAAGCAGAGCTCTCTGGCTAACTAGAGAACCCA  
CTGCTTACTG

GCTTATCGAAATTAATACGACTCACTATAGGGAGACCCAA  
GCTTGGTACC

GAGCTCGGACCGGTGCTAGCATGCATTCCAGGGGAAGGGAAATTGTGGTG  
CTTCTGAACCCATGGTCAATTAACGAGGCAGTTTCTAGCTACTGCACGTA  
CTTCATAAAGCAGGACTCTAAAAGCTTTGGAATCATGGTGTCATGGAAAG  
GGATTTACTTTATACTGACTCTGTTTTGGGGAAGCTTTTTTGGAAAGCATT  
TTCATGCTGAGTCCCTTTTTACCTTTGATGTTTGTAACCCATCTTGGTA  
TCGCTGGATCAACAACCGCCTTGTTGGCAACATGGCTCACCTACCTGTGG  
CATTATTGGAGACCATGTTTGGTGTAAAAGTGATTATAACTGGGGATGCA  
TTTGTTCTGGAGAAAGAAGTGTCATTATCATGAACCATCGGACAAGAAT  
GGACTGGATGTTCTGTGGAATTGCCTGATGCGATATAGCTACCTCAGAT  
TGGAGAAAATTTGCCTCAAAGCGAGTCTCAAAGGTGTTCTGGATTTGGT  
TGGGCCATGCAGGCTGCTGCCTATATCTTCATTCATAGGAAATGGAAGGA  
TGACAAGAGCCATTTGGAAGACATGATTGATTACTTTTTGTGATATTCACG  
AACCACTTCAACTCCTCATATCCCAGAAGGGACTGATCTCACAGAAAAC  
AGCAAGTCTCGAAGTAATGCATTTGCTGAAAAAATGGACTTCAGAAATA  
TGAATATGTTTTACATCCAAGAACTACAGGCTTTACTTTTTGTGGTAGACC  
GTCTAAGAGAAGGTAAGAACCCTTGATGCTGTCCATGATATCACTGTGGCG  
TATCCTCACAACATTCTCAATCAGAGAAGCACCTCCTCCAAGGAGACTT  
TCCCAGGGAAATCCACTTTCACGTCCACCGGTATCCAATAGACACCCTCC  
CCACATCCAAGGAGGACCTTCAACTCTGGTGCCACAAACGGTGGGAAGAG  
AAAGAAGAGAGGCTGCGTTCCTTCTATCAAGGGGAGAAGAATTTTTATT

TACCGGACAGAGTGTCAATCCACCTTGCAAGTCTGAACTCAGGGTCCTG  
TGGTCAAATTGCTCTATACTGTATTGGACCCTGTTCAAGCCCTGCAATG  
TGCCTACTCATATATTTGTACAGTCTTGTTAAGTGGTATTTTATAATCAC  
CATTGTAATCTTTGTGCTGCAAGAGAGAATATTTGGTGGACTGGAGATCA  
TAGAACTTGCATGTTACCGACTTTTACACAAACAGCCACATTTAAATTCA  
AAGAAAAATGAGCTCGAGTATCCATATGACGTCCCAGACTATGCCTAGGC  
GGCCGCATAGATAACTGATCCAGTGTGCTGGAATTAATTC  
GCTGTCTGCG

AGGGCCAGCTGTTGGGGTGAGTACTCCCTCTCAAAGCGG  
GCATGACTTC

TGCGCTAAGATTGTCAGTTTCCAAAAACGAGGAGGATTTG  
ATATTCACCT

GGCCCGCGGTGATGCCTTTGAGGGTGGCCGCGTCCATCTG  
GTCAGAAAAG

ACAATCTTTTTGTTGTCAAGCTTGAGGTGTGGCAGGCTTGA  
GATCTGGCC

ATACACTTGAGTGACAATGACATCCACTTTCCTTTCTCTCC  
ACAGGTGT

CCACTCCCAGGTCCAAGTGCAGGTCGAGCATGCATCTAGG  
GCGGCCAATT

CCGCCCTCTCCCTCCCCCCCCCTAACGTTACTGGCCGAA  
GCCGCTTGG

AATAAGGCCGGTGTGCGTTTGTCTATATGTTATTTCCACC  
ATATTGCCG

TCTTTTGGCAATGTGAGGGCCCGAAACCTGGCCCTGTCT  
TCTTGACGAG

CATTCTAGGGGTCTTTCCCTCTCGCCAAAGGAATGCAAG  
GTCTGTTGA

ATGTCGTGAAGGAAGCAGTTCCTCTGGAAGCTTCTTGAAG  
ACAAACAACG

TCTGTAGCGACCCTTTCAGGCAGCGGAACCCCCACCTG  
GCGACAGGTG

CCTCTGCGGCCAAAAGCCACGTGTATAAGATACACCTGCA  
AAGGCGGCAC

AACCCCAGTGCCACGTTGTGAGTTGGATAGTTGTGGAAAG  
AGTCAAATGG

CTCTCCTCAAGCGTATTCAACAAGGGGCTGAAGGATGCCC  
AGAAGGTACC

CCATTGTATGGGATCTGATCTGGGGCCTCGGTGCACATGC  
TTTACATGTG

TTTAGTCGAGGTTAAAAAACGTCTAGGCCCCCGAACCA  
CGGGGACGTG

GTTTTCTTTGAAAAACACGATGATAAGCTTGCCACAACCC  
GGGATAATT

CCTGCAGCCAATATGGGATCGGCCATTGAACAAGATGGAT  
TGCACGCAGG

TTCTCCGGCCGCTTGGGTGGAGAGGCTATTCGGCTATGAC  
TGGGCACAAC

AGACAATCGGCTGCTCTGATGCCGCCGTGTTCCGGCTGTC  
AGCGCAGGGG

CGCCCGTTCTTTTTGTCAAGACCGACCTGTCCGGTGCCCT  
GAATGAACT

GCAGGACGAGGCAGCGCGGCTATCGTGGCTGGCCACGAC  
GGGCGTTCCTT

GCGCAGCTGTGCTCGACGTTGTCACTGAAGCGGGAAGGG  
ACTGGCTGCTA

TTGGGCGAAGTGCCGGGGCAGGATCTCCTGTCATCTCACC  
TTGCTCCTGC

CGAGAAAGTATCCATCATGGCTGATGCAATGCGGCGGCTG  
CATACGCTTG

ATCCGGCTACCTGCCCATTCGACCACCAAGCGAAACATCG  
CATCGAGCGA

GCACGTA CT CGGATGGAAGCCGGTCTTGTCGATCAGGATG  
ATCTGGACGA

AGAGCATCAGGGGCTCGCGCCAGCCGAACTGTTCCGCCAG  
GCTCAAGGCGC

GCATGCCCCGACGGCGATGATCTCGTCGTGACCCATGGCGA  
TGCCTGCTTG

CCGAATATCATGGTGGAAAATGGCCGCTTTTCTGGATTCAT  
CGACTGTGG

CCGGCTGGGTGTGGCGGACCGCTATCAGGACATAGCGTT  
GGCTACCCGTG

ATATTGCTGAAGAGCTTGGCGGCGAATGGGCTGACCGCTT  
CCTCGTGCTT

TACGGTATCGCCGCTCCCGATTGCAGCGCATCGCCTTCTA  
TCGCCTTCT

TGACGAGTTCTTCTGAGGGGATCAATTCTCTAGATAACTG  
ATCATAATCA

GCCATACCACATTTGTAGAGGTTTTACTTGCTTTAAAAAAC  
CTCCACAC

CTCCCCCTGAACCTGAAACATAAAATGAATGCAATTGTTGT  
TGTTAACTT

GTTTATTGCAGCTTATAATGGTTACAAATAAAGCAATAGCA  
TCACAAATT

TCACAAATAAAGCATTTTTTTCACTGCATTCTAGTTGTGGTT  
TGTCCAA

CTCATCAATGTATCTTAACGCGTCGAGTGCATTCTAGTTGT  
GGTTTGTC

AAACTCATCAATGTATCTTATCATGTCTGTATACCGTCGAC  
CTCTAGCTA

GAGCTTGGCGTAATCATGGTCATAGCTGTTTCCTGTGTGA  
AATTGTTATC

CGCTCACAATTCCACACAACATACGAGCCGGAAGCATAAA  
GTGTAAAGCC

TGGGGTGCCTAATGAGTGAGCTAACTCACATTAATTGCGT  
TGCCTCACT

GCCCGCTTTCCAGTCGGGAAACCTGTCGTGCCAGCTGCAT  
TAATGAATCG

GCCAACGCGCGGGGAGAGGCGGTTTTCGTATTGGGCGCT  
CTTCCGCTTCC

TCGCTCACTGACTCGCTGCGCTCGGTCGTTTCGGCTGCGGC  
GAGCGGTATC

AGCTCACTCAAAGGCGGTAATACGGTTATCCACAGAATCA  
GGGATAACG

CAGGAAAGAACATGTGAGCAAAGGCCAGCAAAGGCCA  
GGAACCGTAAA

AAGCCGCGTTGCTGGCGTTTTTCCATAGGCTCCGCCCCC  
TGACGAGCA

TCACAAAATCGACGCTCAAGTCAGAGGTGGCGAAACCCG  
ACAGGACTAT

AAAGATACCAGGCGTTTCCCCTGGAAGCTCCCTCGTGCG  
CTCTCCTGTT

CCGACCCTGCCGCTTACCGGATACCTGTCCGCTTTCTCCC  
TTCGGGAAG

CGTGGCGCTTTCTCAATGCTCACGCTGTAGGTATCTCAGTT  
CGGTGTAGG

TCGTTGCTCCAAGCTGGGCTGTGTGCACGAACCCCCGTT  
CAGCCCGAC

CGCTGCGCCTTATCCGGTAACTATCGTCTTGAGTCCAACCC  
GGTAAGACA

CGACTTATCGCCACTGGCAGCAGCCACTGGTAACAGGATT  
AGCAGAGCGA

GGTATGTAGGCGGTGCTACAGAGTTCTTGAAGTGGTGGCC  
TAACTACGGC  
TACTACTAGAAGGACAGTATTTGGTATCTGCGCTCTGCTGA  
AGCCAGTTAC  
CTTCGGAAAAAGAGTTGGTAGCTCTTGATCCGGCAAACAA  
ACCACCGCTG  
GTAGCGGTGGTTTTTTTTGTTTGAAGCAGCAGATTACGCG  
CAGAAAAAAA  
GGATCTCAAGAAGATCCTTTGATCTTTTCTACGGGGTCTGA  
CGCTCAGTG  
GAACGAAAACCTCACGTTAAGGGATTTTGGTCATGAGATTA  
TCAAAAAGGA  
TCTTCACCTAGATCCTTTTAAATTAATAAATGAAGTTTTAAAT  
CAATCTAA  
AGTATATATGAGTAAACTTGGTCTGACAGTTACCAATGCTT  
AATCAGTGA  
GGCACCTATCTCAGCGATCTGTCTATTTGTTTCATCCATAG  
TTGCCTGAC  
TCCCCGTCGTGTAGATAACTACGATACGGGAGGGCTTACC  
ATCTGGCCCC  
AGTGCTGCAATGATACCGCGAGACCCACGCTCACCGGCTC  
CAGATTTATC  
AGCAATAAACCAGCCAGCCGGAAGGGCCGAGCGCAGAAG  
TGGTCCTGCAA  
CTTTATCCGCCTCCATCCAGTCTATTAATTGTTGCCGGGAA  
GCTAGAGTA  
AGTAGTTCGCCAGTTAATAGTTTGCGCAACGTTGTTGCCAT  
TGCTACAGG  
CATCGTGGTGTACGCTCGTCGTTTGGTATGGCTTCATTCA  
GCTCCGGTT

CCCAACGATCAAGGCGAGTTACATGATCCCCATGTTGTG  
CAAAAAAGCG  
GTTAGCTCCTTCGGTCCTCCGATCGTTGTCAGAAGTAAGTT  
GGCCGCAGT  
GTTATCACTCATGGTTATGGCAGCACTGCATAATTCTCTTA  
CTGTCATGC  
CATCCGTAAGATGCTTTTCTGTGACTGGTGAGTACTCAACC  
AAGTCATT  
TGAGAATAGTGTATGCGGCGACCGAGTTGCTCTTGCCCGG  
CGTCAATACG  
GGATAATACCGCGCCACATAGCAGAACTTTAAAAGTGCTC  
ATCATTGGAA  
AACGTTCTTCGGGGCGAAAACCTCAAGGATCTTACCGCT  
GTTGAGATCC  
AGTTCGATGTAACCCACTCGTGCACCCAACTGATCTTCAGC  
ATCTTTTAC  
TTTACCAGCGTTTCTGGGTGAGCAAAAACAGGAAGGCAA  
AATGCCGCAA  
AAAAGGGAATAAGGGCGACACGGAAATGTTGAATACTCA  
TACTCTTCCTT  
TTTCAATATTATTGAAGCATTATCAGGGTTATTGTCTCATG  
AGCGGATA  
CATATTTGAATGTATTTAGAAAAATAACAAATAGGGGTT  
CCGCGCACAT  
TTCCCCGAAAAGTGCCACCTGACGTC

### **Plasmid map and gene sequence of pSems-ALCAT1-mCherry**

BmrI AcI

#### Molecule Features

Molecule: pSems-ALCAT1-mCherry, 7154 bps DNA Circular

File Name: pSems-ALCAT1-mCherry.cm5, dated 07 Jun 2016

Description:

| Start | End  | Name     | Feature Key | Draw |
|-------|------|----------|-------------|------|
| 921   | 2162 | ALCAT1   |             | Gene |
| 2169  | 2876 | mCherry  |             | Gene |
| 3841  | 4641 | Neomycin |             | Gene |

GACGGATCGGGAGATCTCCCGATCCCCTATGGTCGACTCT  
CAGTACAATC

TGCTCTGATGCCGCATAGTTAAGCCAGTATCTGCTCCCTGC  
TTGTGTGTT

GGAGGTCGCTGAGTAGTGC GCGAGCAAATTTAAGCTAC  
AACAAGGCAAG

GCTTGACCGACAATTGCATGAAGAATCTGCTTAGGGTTAG  
GCGTTTTGCG

CTGCTTCGCGATGTACGGGCCAGATATACGCGTTGACATT  
GATTATTGAC

TAGTTATTAATAGTAATCAATTACGGGGTCATTAGTTCATA  
GCCCATATA

TGGAGTTCGCGTTACATAACTTACGGTAAATGGCCCCGCC  
TGGCTGACCG

CCCAACGACCCCCGCCATTGACGTCAATAATGACGTATGT  
TCCCATAGT

AACGCCAATAGGGACTTTCCATTGACGTCAATGGGTGGAC  
TATTTACGGT

AAACTGCCCACTTGGCAGTACATCAAGTGTATCATATGCCA  
AGTACGCCC



CCTATTGACGTCAATGACGGTAAATGGCCCGCTGGCATT  
ATGCCAGTA

CATGACCTTATGGGACTTTCCTACTTGGCAGTACATCTACG  
TATTAGTCA

TCGCTATTACCATGGTGATGCGGTTTTGGCAGTACATCAAT  
GGGCGTGGA

TAGCGGTTTGACTCACGGGGATTTCCAAGTCTCCACCCCAT  
TGACGTCAA

TGGGAGTTTGTTTTGGCACCAAATCAACGGGACTTTCCA  
AAATGTCGTA

ACAACCTCCGCCCCATTGACGCAAATGGGCGGTAGGCGTGT  
ACGGTGGGAG

GTCTATATAAGCAGAGCTCTCTGGCTAACTAGAGAACCCA  
CTGCTTACTG

GCTTATCGAAATTAATACGACTCACTATAGGGAGACCCAA  
GCTTGGTACC

GAGCTCGGACCGGTGCTAGCATGCATTCCAGGGGAAGGGAAATTGTGGTG  
CTTCTGAACCCATGGTCAATTAACGAGGCAGTTTCTAGCTACTGCACGTA  
CTTCATAAAGCAGGACTCTAAAAGCTTTGGAATCATGGTGTGATGAAAG  
GGATTTACTTTATACTGACTCTGTTTTGGGGAAGCTTTTTTGAAGCATT  
TTCATGCTGAGTCCTTTTACCTTTGATGTTTGTAACCCATCTTGGA  
TCGCTGGATCAACAACCGCCTGTGGCAACATGGCTCACCTACCTGTGG  
CATTATTGGAGACCATGTTTGGTGTAAAAGTGATTATAACTGGGGATGCA  
TTTGTTCTGGAGAAAGAAGTGTCAATATCATGAACCATCGGACAAGAAT  
GGACTGGATGTTCTGTGGAATTGCCTGATGCGATATAGCTACCTCAGAT  
TGGAGAAAATTTGCCTCAAAGCGAGTCTCAAAGGTGTTCTGGATTTGGT  
TGGCCATGCAGGCTGCTGCCTATATCTTCATTCATAGGAAATGGAAGGA  
TGACAAGAGCCATTTGGAAGACATGATTGATTACTTTTGTGATATTCAG  
AACCACTTCAACTCCTCATATCCAGAAGGGACTGATCTCACAGAAAAC  
AGCAAGTCTCGAAGTAATGCATTTGCTGAAAAAATGGACTTCAGAAATA  
TGAATATGTTTTACATCCAAGAACTACAGGCTTTACTTTTGTGGTAGACC  
GTCTAAGAGAAGGTAAGAACCTTGATGCTGTCCATGATATCACTGTGGCG  
TATCCTCACAACATTCTCAATCAGAGAAGCACCTCCTCCAAGGAGACTT  
TCCCAGGGAAATCCACTTTCACGTCCACCGGTATCCAATAGACACCCTCC  
CCACATCCAAGGAGGACCTTCAACTCTGGTGCCACAAACGGTGGGAAGAG  
AAAGAAGAGAGGCTGCGTTCTTCTATCAAGGGGAGAAGAATTTTTATT  
TACCGGACAGAGTGTCAATCCACCTTGCAAGTCTGAACTCAGGGTCCTTG  
TGGTCAAATTGCTCTCTATACTGTATTGGACCCTGTTAGCCCTGCAATG  
TGCTACTCATATATTTGTACAGTCTTGTTAAGTGGTATTTTATAATCAC

CATTGTAATCTTTGTGCTGCAAGAGAGAATATTTGGTGGACTGGAGATCA  
TAGAACTTGCATGTTACCGACTTTTACACAAAACAGCCACATTTAAATTCA  
AAGAAAAATGAGCTCGAGATGGTGAGCAAGGGCGAGGAGGATAACATGGC  
CATCATCAAGGAGTTCATGCGCTTCAAGGTGCACATGGAGGGCTCCGTGA  
ACGGCCACGAGTTCGAGATCGAGGGCGAGGGCGAGGGCCGCCCTACGAG  
GGCACCCAGACCGCCAAGCTGAAGGTGACCAAGGGTGGCCCCCTGCCCTT  
CGCTGGGACATCCTGTCCCCTCAGTTCATGTACGGCTCCAAGGCCTACG  
TGAAGCACCCCGCGACATCCCCGACTACTTGAAGCTGTCTTCCCCGAG  
GGCTTCAAGTGGGAGCGCGTGATGAACTTCGAGGACGGCGGCGTGGTGAC  
CGTGACCCAGGACTCCTCCCTGCAGGACGGCGAGTTCATCTACAAGGTGA  
AGCTGCGCGCACCAACTTCCCCTCCGACGGCCCCGTAATGCAGAAGAAG  
ACCATGGGCTGGGAGGCCTCCTCCGAGCGGATGTACCCCGAGGACGGCGC  
CCTGAAGGGCGAGATCAAGCAGAGGCTGAAGCTGAAGGACGGCGGCCACT  
ACGACGCTGAGGTCAAGACCCTACAAGGCCAAGAAGCCCGTGCAGCTG  
CCCGGCGCCTACAACGTCAACATCAAGTTGGACATCACCTCCCACAACGA  
GGACTACACCATCGTGGAACAGTACGAACGCGCCGAGGGCCGCCACTCCA  
CCGGCGGCATGGACGAGCTGTACAAGCGGCCGCATAGATAACTGATCCA  
GTGTGCTGGAATTAATTCGCTGTCTGCGAGGGCCAGCTGT

TGGGGTGAGT

ACTCCCTCTCAAAGCGGGCATGACTTCTGCGCTAAGATT

GTCAGTTTCC

AAAAACGAGGAGGATTTGATATTCACCTGGCCCCGCGGTGA

TGCCTTTGAG

GGTGGCCGCGTCCATCTGGTCAGAAAAGACAATCTTTTTG

TTGTCAAGCT

TGAGGTGTGGCAGGCTTGAGATCTGGCCATACACTTGAGT

GACAATGACA

TCCACTTTGCCTTTCTCTCCACAGGTGTCCACTCCCAGGTCC

AACTGCAG

GTCGAGCATGCATCTAGGGCGGCCAATTCGCCCCCTCTCC

CTCCCCCCCC

CCTAACGTTACTGGCCGAAGCCGCTTGAATAAGGCCGGT

GTGCGTTTGT

CTATATGTTATTTTCCACCATATTGCCGTCTTTTGGCAATGT

GAGGGCCC

GGAAACCTGGCCCTGTCTTCTTGACGAGCATTCTAGGGG

TCTTCCCCCT

CTCGCCAAAGGAATGCAAGGTCTGTTGAATGTCGTGAAGG  
AAGCAGTTCC

TCTGGAAGCTTCTTGAAGACAAACAACGTCTGTAGCGACC  
CTTTGCAGGC

AGCGGAACCCCCACCTGGCGACAGGTGCCTCTGCGGCCA  
AAAGCCACGT

GTATAAGATACACCTGCAAAGGCGGCACAACCCCAGTGCC  
ACGTTGTGAG

TTGGATAGTTGTGGAAGAGTCAAATGGCTCCTCAAGC  
GTATTCAACA

AGGGGCTGAAGGATGCCAGAAGGTACCCATTGTATGG  
GATCTGATCTG

GGCCTCGGTGCACATGCTTTACATGTGTTTAGTCGAGGT  
TAAAAAACG

TCTAGGCCCCCGAACCACGGGGACGTGGTTTTCTTTGA  
AAAACACGAT

GATAAGCTTGCCACAACCCGGGATAATTCCTGCAGCCAAT  
ATGGGATCGG

CCATTGAACAAGATGGATTGCACGCAGGTTCTCCGGCCGC  
TTGGGTGGAG

AGGCTATTCGGCTATGACTGGGCACAACAGACAATCGGCT  
GCTCTGATGC

CGCCGTGTTCCGGCTGTCAGCGCAGGGGCGCCCGTTCTT  
TTTGTCAAGA

CCGACCTGTCCGGTGCCCTGAATGAACTGCAGGACGAGGC  
AGCGCGGCTA

TCGTGGCTGGCCACGACGGGCGTTCCTTGCAGCTGTGC  
TCGACGTTGT

CACTGAAGCGGGAAGGGACTGGCTGCTATTGGGCGAAGT  
GCCGGGGCAGG

ATCTCCTGTCATCTCACCTTGCTCCTGCCGAGAAAGTATCC  
ATCATGGCT

GATGCAATGCGGCGGCTGCATACGCTTGATCCGGCTACCT  
GCCATTCTGA

CCACCAAGCGAAACATCGCATCGAGCGAGCACGTACTIONCGG  
ATGGAAGCCG

GTCTTGTCGATCAGGATGATCTGGACGAAGAGCATCAGG  
GGCTCGCGCCA

GCCGAACTGTTCCGAGGCTCAAGGCGCGCATGCCCGACG  
GCGATGATCT

CGTCGTGACCCATGGCGATGCCTGCTTGCCGAATATCATG  
GTGGAAAATG

GCCGCTTTTCTGGATTCATCGACTGTGGCCGGCTGGGTGT  
GGCGGACCGC

TATCAGGACATAGCGTTGGCTACCCGTGATATTGCTGAAG  
AGCTTGCGCG

CGAATGGGCTGACCGCTTCCTCGTGCTTTACGGTATCGCC  
GCTCCCGATT

CGCAGCGCATCGCCTTCTATCGCCTTCTTGACGAGTTCTTC  
TGAGGGGAT

CAATTCTCTAGATAACTGATCATAATCAGCCATACCACATT  
TGTAGAGGT

TTTACTTGCTTTAAAAAACCTCCCACACCTCCCCCTGAACCT  
GAAACATA

AAATGAATGCAATTGTTGTTGTTAACTTGTTTATTGCAGCT  
TATAATGGT

TACAAATAAAGCAATAGCATCACAAATTTACAAATAAAG  
CATTTTTTTC

ACTGCATTCTAGTTGTGGTTTGTCCAAACTCATCAATGTAT  
CTTAACGCG

TCGAGTGCATTCTAGTTGTGGTTTGTCCAACTCATCAATG  
TATCTTATC

ATGTCTGTATACCGTCGACCTCTAGCTAGAGCTTGGCGTAA  
TCATGGTCA

TAGCTGTTTCCTGTGTGAAATTGTTATCCGCTCACAATTCC  
ACACAACAT

ACGAGCCGGAAGCATAAAGTGTAAGCCTGGGGTGCCTA  
ATGAGTGAGCT

AACTCACATTAATTGCGTTGCGCTCACTGCCCCGTTTCCAG  
TCGGGAAAC

CTGTCGTGCCAGCTGCATTAATGAATCGGCCAACGCGCGG  
GGAGAGGCGG

TTTGCGTATTGGGCGCTCTTCCGCTTCTCGCTCACTGACT  
CGCTGCGCT

CGGTCGTTGCGCTGCGGCGAGCGGTATCAGCTCACTCAA  
GGCGGTAATA

CGGTTATCCACAGAATCAGGGGATAACGCAGGAAAGAAC  
ATGTGAGCAAA

AGGCCAGCAAAAGGCCAGGAACCGTAAAAAGGCCGCGTT  
GCTGGCGTTTT

TCCATAGGCTCCGCCCCCTGACGAGCATCACAAAATCG  
ACGCTCAAGT

CAGAGGTGGCGAAACCCGACAGGACTATAAAGATACCAG  
GCGTTTCCCCC

TGGAAGCTCCCTCGTGCGCTCTCCTGTTCCGACCCTGCCGC  
TTACCGGAT

ACCTGTCCGCCTTTCTCCCTTCGGGAAGCGTGGCGCTTTCT  
CAATGCTCA

CGCTGTAGGTATCTCAGTTCGGTGTAGGTCGTTGCTCCAA  
GCTGGGCTG

TGTGCACGAACCCCCGTTTCAGCCCGACCGCTGCGCCTTAT  
CCGGTAACT

ATCGTCTTGAGTCCAACCCGGTAAGACACGACTTATCGCC  
ACTGGCAGCA

GCCACTGGTAACAGGATTAGCAGAGCGAGGTATGTAGGC  
GGTGCTACAGA

GTTCTTGAAGTGGTGGCCTAACTACGGCTACACTAGAAGG  
ACAGTATTTG

GTATCTGCGCTCTGCTGAAGCCAGTTACCTTCGGAAAAAG  
AGTTGGTAGC

TCTTGATCCGGCAAACAAACCACCGCTGGTAGCGGTGGTT  
TTTTTGTTG

CAAGCAGCAGATTACGCGCAGAAAAAAGGATCTCAAGA  
AGATCCTTTGA

TCTTTTCTACGGGGTCTGACGCTCAGTGGAACGAAAATC  
ACGTTAAGGG

ATTTTGGTCATGAGATTATCAAAAAGGATCTTACCTAGAT  
CCTTTTAAA

TTAAAAATGAAGTTTTAAATCAATCTAAAGTATATATGAGT  
AAACTTGGT

CTGACAGTTACCAATGCTTAATCAGTGAGGCACCTATCTCA  
GCGATCTGT

CTATTTGTTTCATCCATAGTTGCCTGACTCCCCGTCGTGTA  
GATAACTAC

GATACGGGAGGGCTTACCATCTGGCCCCAGTGCTGCAATG  
ATACCGCGAG

ACCCACGCTCACCGGCTCCAGATTTATCAGCAATAAACCAG  
CCAGCCGGA

AGGGCCGAGCGCAGAAGTGGTCCTGCAACTTTATCCGCCT  
CCATCCAGTC

TATTAATTGTTGCCGGAAGCTAGAGTAAGTAGTTCGCCA  
GTTAATAGTT

TGCGCAACGTTGTTGCCATTGCTACAGGCATCGTGGTGTC  
ACGCTCGTCG

TTTGGTATGGCTTCATTCAGCTCCGGTCCCAACGATCAAG  
GCGAGTTAC

ATGATCCCCATGTTGTGCAAAAAGCGGTTAGCTCCTTCG  
GTCCTCCGA

TCGTTGTCAGAAGTAAGTTGGCCGCAGTGTATCACTCAT  
GGTTATGGCA

GCACTGCATAATTCTTACTGTCATGCCATCCGTAAGATG  
CTTTTCTGT

GACTGGTGAGTACTCAACCAAGTCATTCTGAGAATAGTGT  
ATGCGGCGAC

CGAGTTGCTCTTGCCCGCGTCAATACGGGATAATACCGC  
GCCACATAGC

AGAACTTTAAAAGTGCTCATCATTGGAAAACGTTCTTCGG  
GGCGAAAAC

CTCAAGGATCTTACCGCTGTTGAGATCCAGTTCGATGTAAC  
CCTACTCGTG

CACCCAACGATCTTCAGCATCTTTACTTTACCAGCGTTT  
CTGGGTGA

GCAAAAACAGGAAGGCAAAATGCCGCAAAAAGGGAATA  
AGGGCGACACG

GAAATGTTGAATACTCATACTCTTCCTTTTCAATATTATTG  
AAGCATT

ATCAGGGTTATTGTCTCATGAGCGGATACATATTTGAATGT  
ATTTAGAAA

AATAAACAAATAGGGGTTCCGCGCACATTTCCCGAAAAG  
TGCCACCTGA

CGTC
